# Supplementary material for: Characterization of 3D Organotypic Culture of Mouse Adipose-Derived Stem Cells
Source: MDPI journal article supplement (doi:10.3390/ijms25073931), 2024-04-01
Supplement: s1 [file ijms-2860309-supplementary.pdf › ijms-2860309-supplementary.pdf]

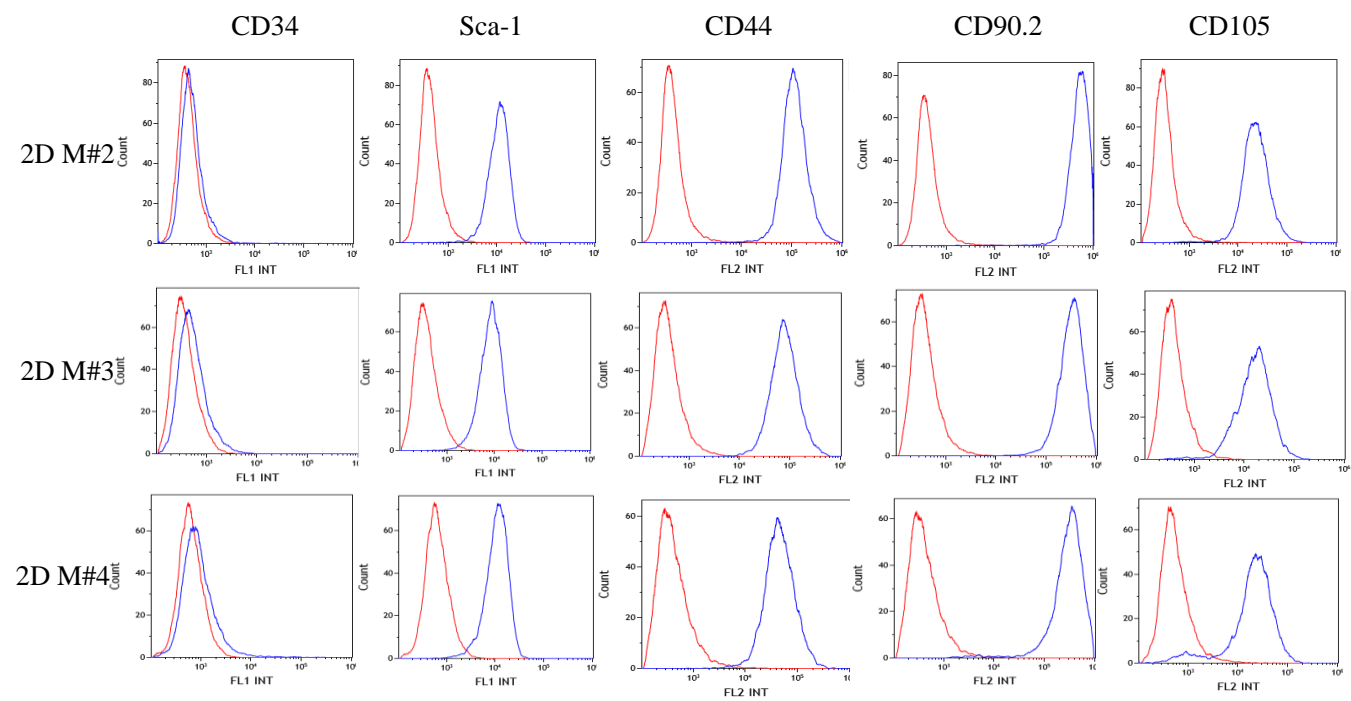

Supplementary Figure S1A

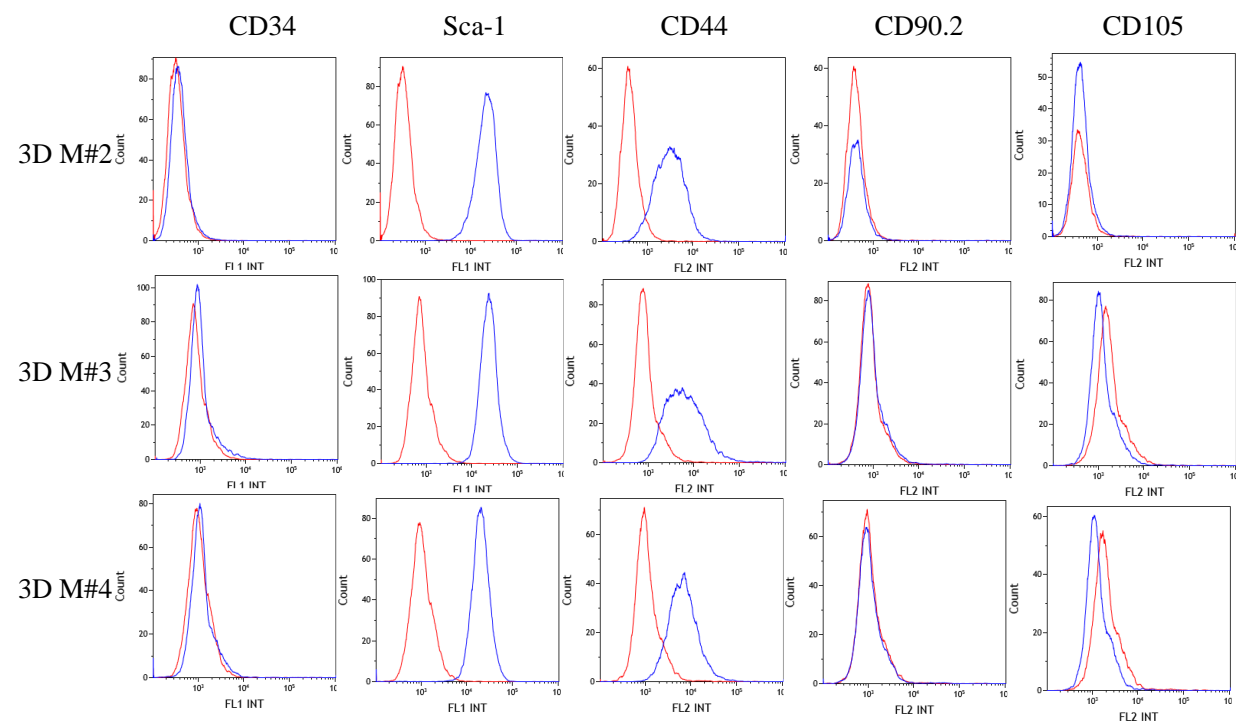

Supplementary Figure S1B

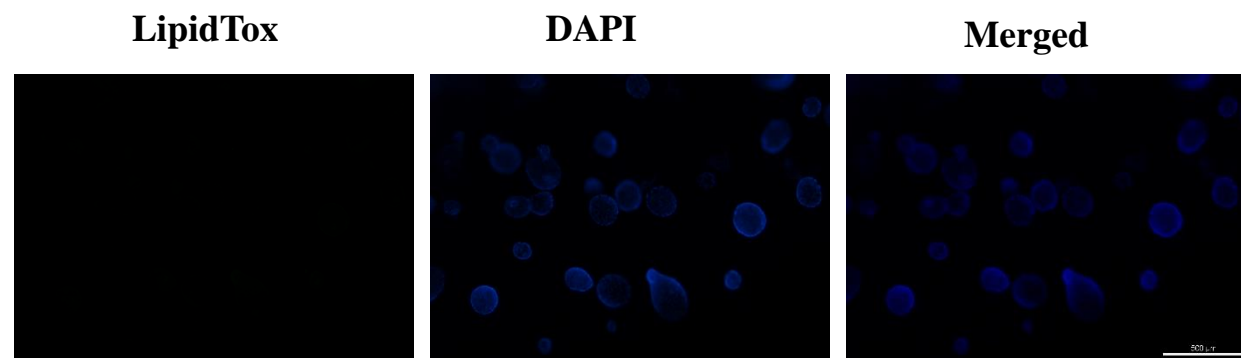

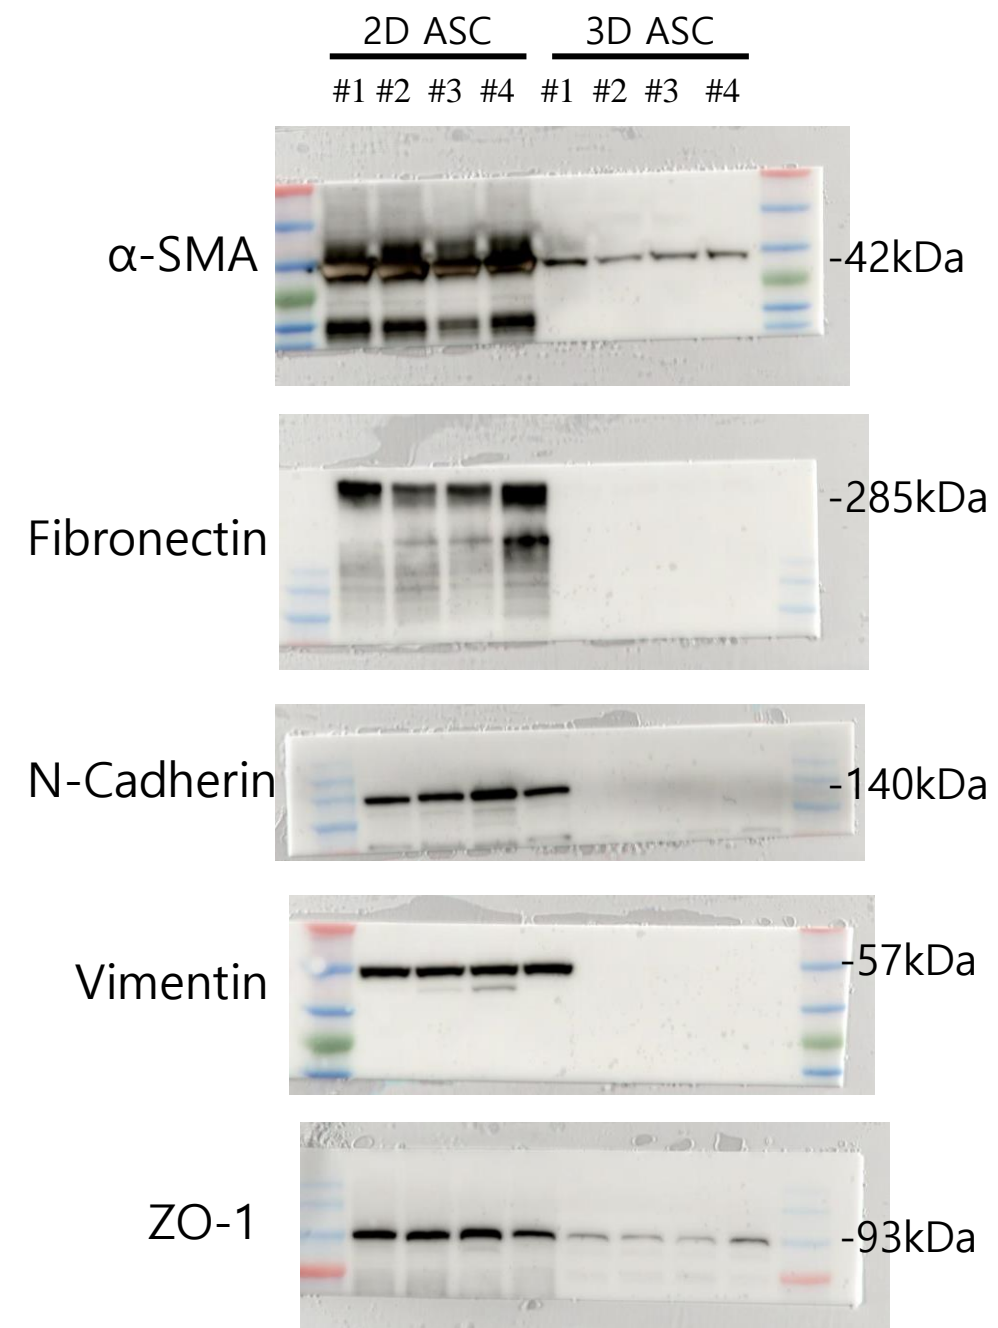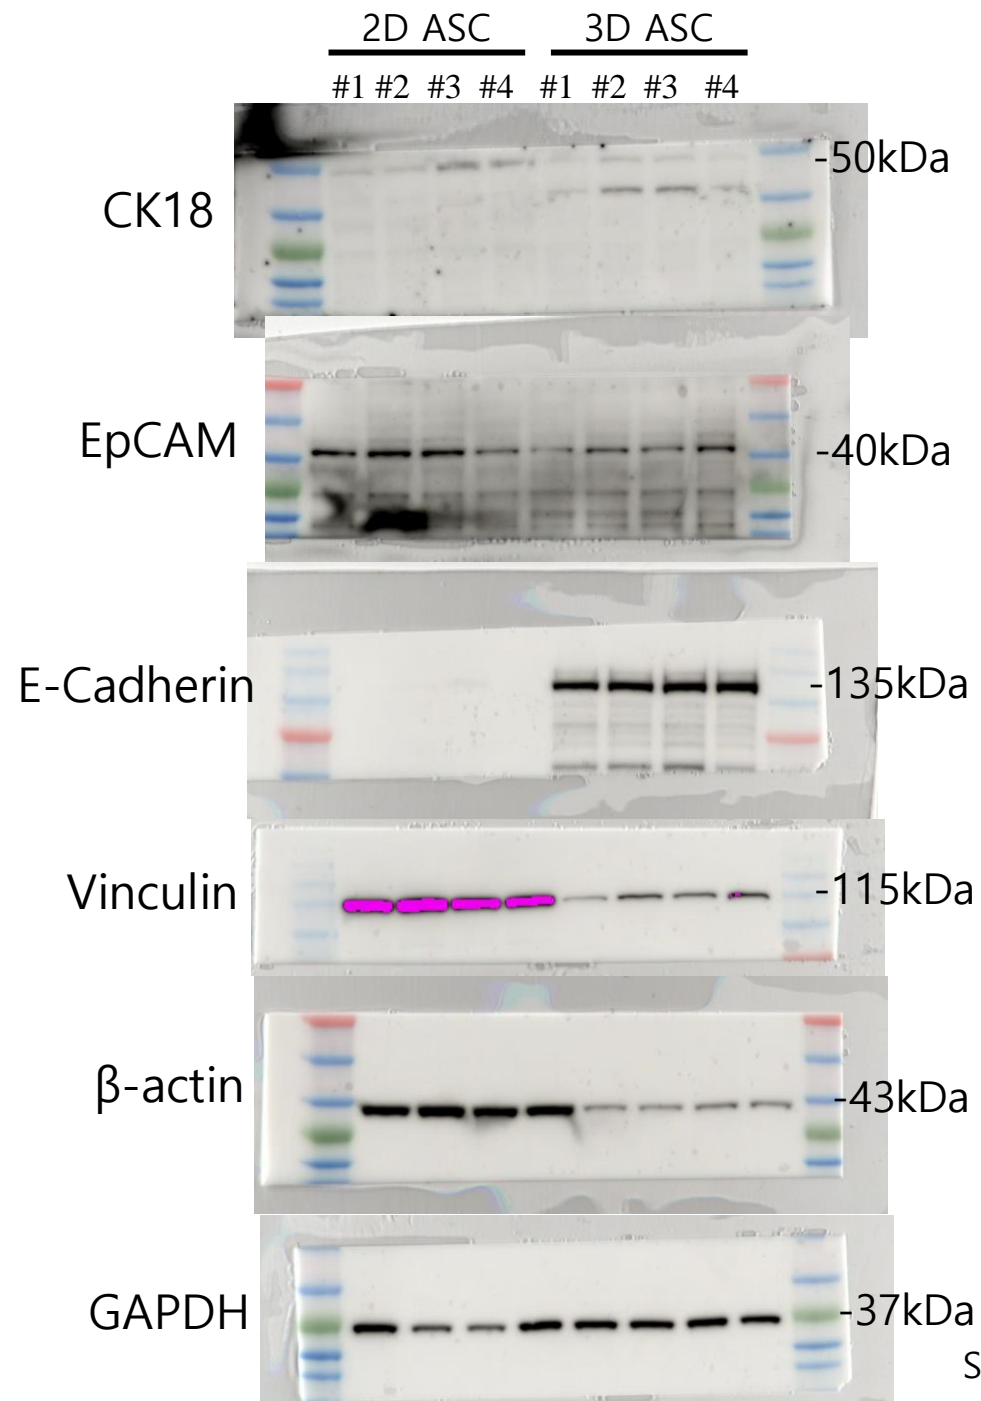

Supplementary Figure S3

## Supplementary legends

Figure S1. Additional flow cytometry analysis results for ADSCs from mice #2, #3, and #4.

(A) Histograms for 2D-cultured ADSCs.

(B) Histograms for 3D-cultured ADSCs.

Figure S2. Analysis of adipogenic differentiation using staining methods.

The 3D-cultured ADSCs were stained with LipidTox, a fluorescent stain for fat, and DAPI was used for nuclear staining.

Figure S3. Original blots/gels are presented
